# Supplementary material for: Altered glucuronidation deregulates androgen dependent response profiles and signifies castration resistance in prostate cancer
Source: PubMed Central journal article supplement (PMC8448517; doi:10.18632/oncotarget.28059), 2021-09-14
Supplement: oncotarget-12-1886-s001.pdf [file oncotarget-12-1886-s001.pdf]

## Altered glucuronidation deregulates androgen dependent response profiles and signifies castration resistance in prostate cancer

### SUPPLEMENTARY MATERIALS

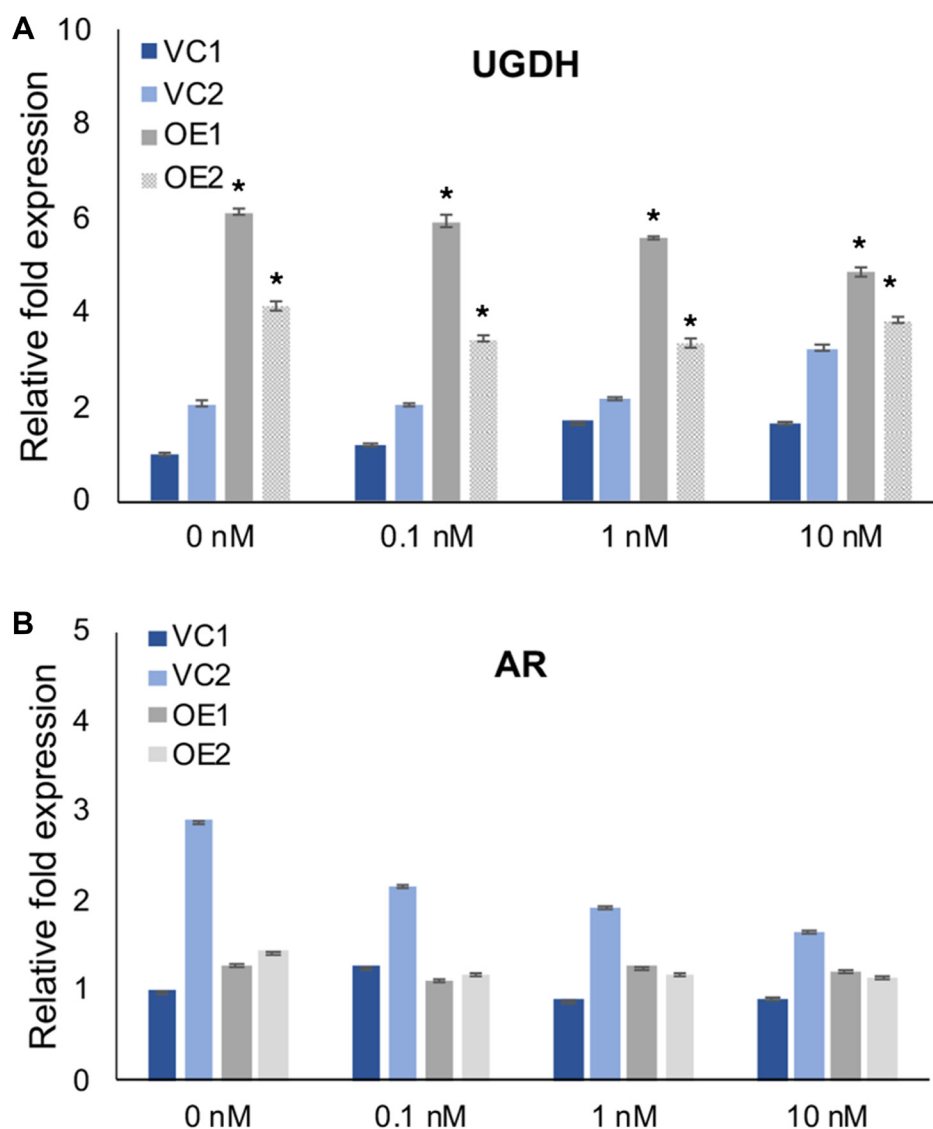

**Supplementary Figure 1: UGDH and AR expression in LNCaP cell lines VC1, VC2, OE1 and OE2.** Cells were incubated in the presence and absence of DHT as indicated (in nM), and assayed by western blot, followed by densitometric analysis relative to tubulin. Mean  $\pm$  SEM is plotted. \* $p < 0.05$  relative to VC1 or VC2 at all [DHT]. (A) Relative UGDH expression. (B) Relative AR expression.

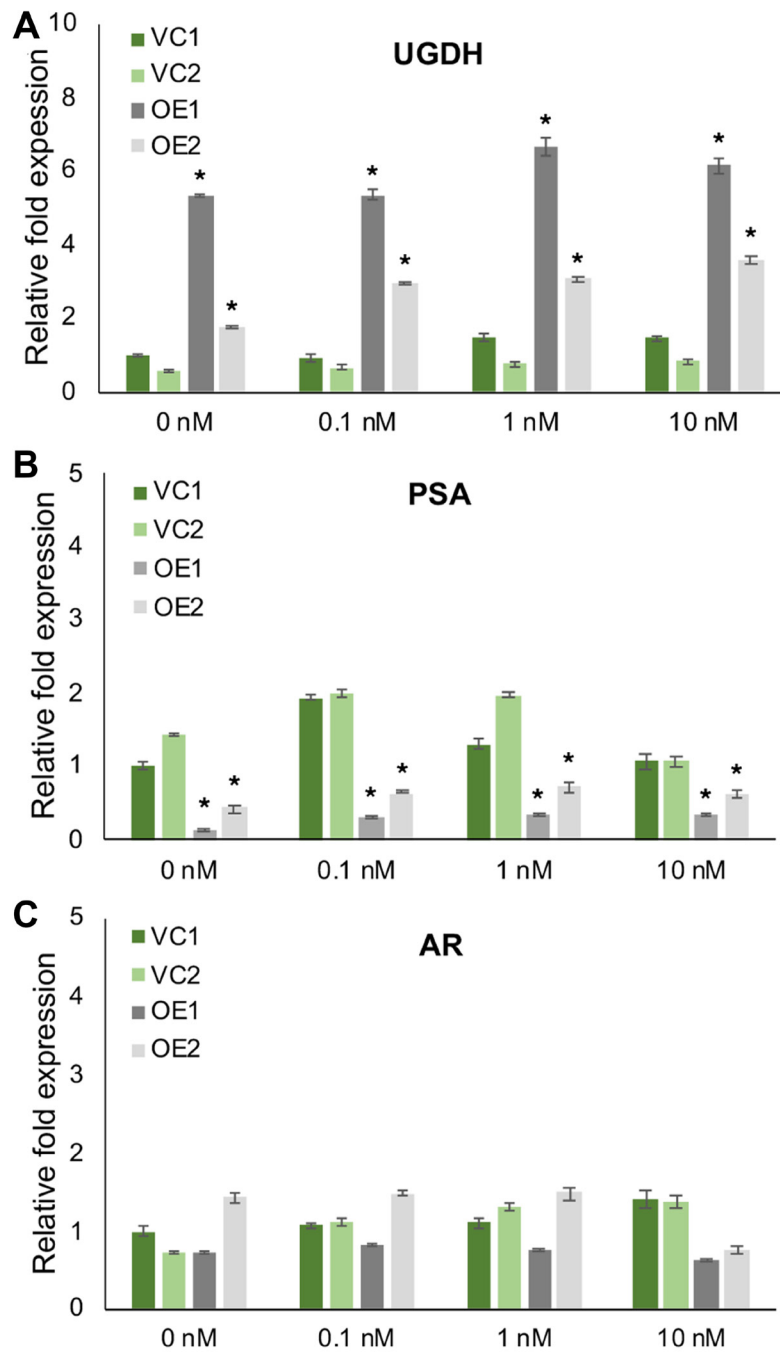

**Supplementary Figure 2: UGDH, PSA, and AR expression in LNCaP CR lines VC1, VC2, OE1 and OE2.** Cells were incubated in the presence and absence of DHT as indicated (in nM), and assayed by western blot, followed by densitometric analysis relative to tubulin. Mean  $\pm$  SEM is plotted. \* $p < 0.05$  relative to VC1 or VC2 at all [DHT]. (A) Relative UGDH expression. (B) Relative PSA expression. (C) Relative AR expression.

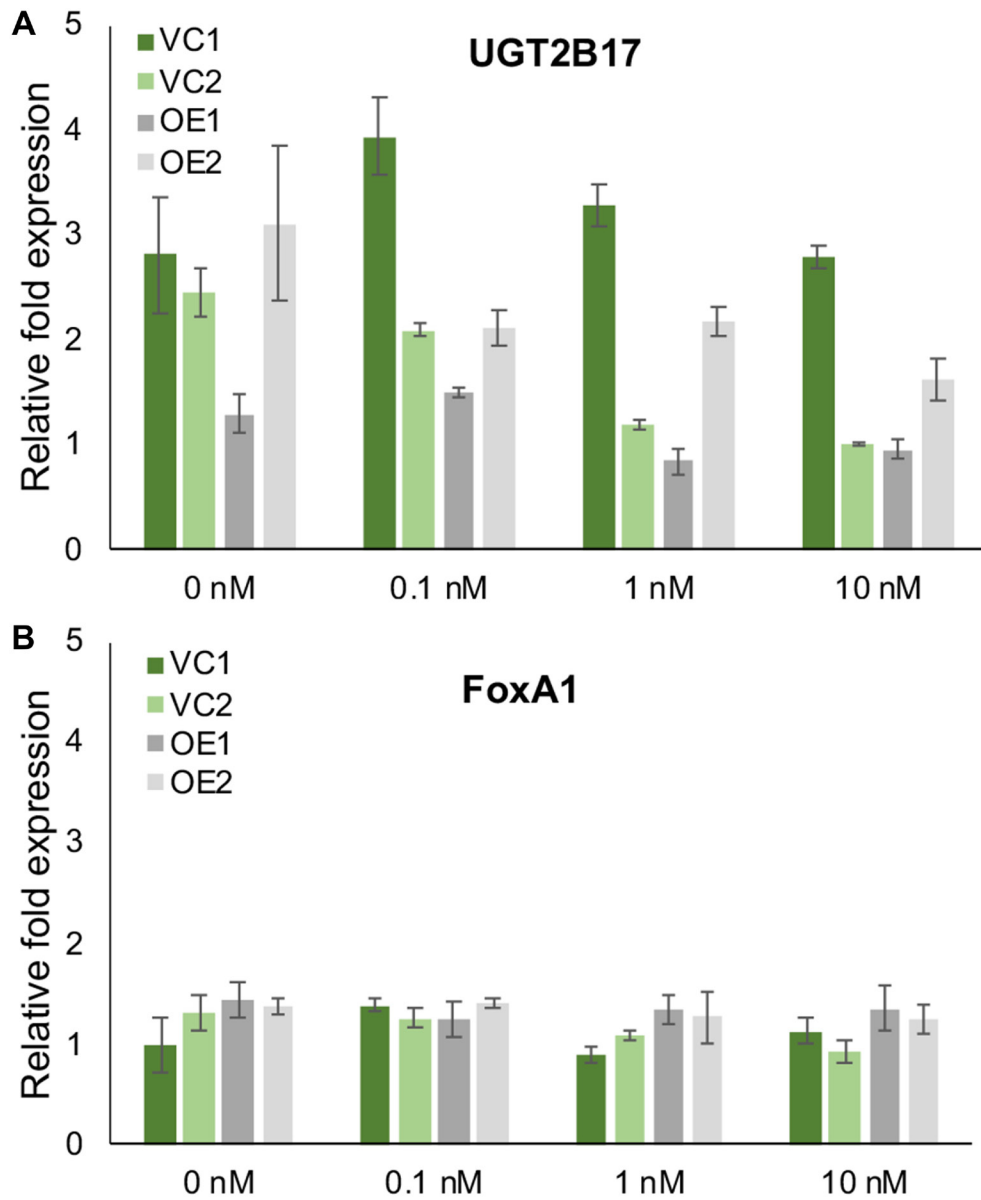

**Supplementary Figure 3: UGT2B17 and FoxA1 expression in LNCaP CR lines VC1, VC2, OE1, OE2 in the presence and absence of DHT (in nM) assayed by western blot and densitometric analysis.** Mean  $\pm$  SEM is plotted for technical triplicates of a representative assay. No consistent, statistically significant differences were found between three replicate assays. (A) Relative UGT2B17 expression. (B) Relative FoxA1 expression.

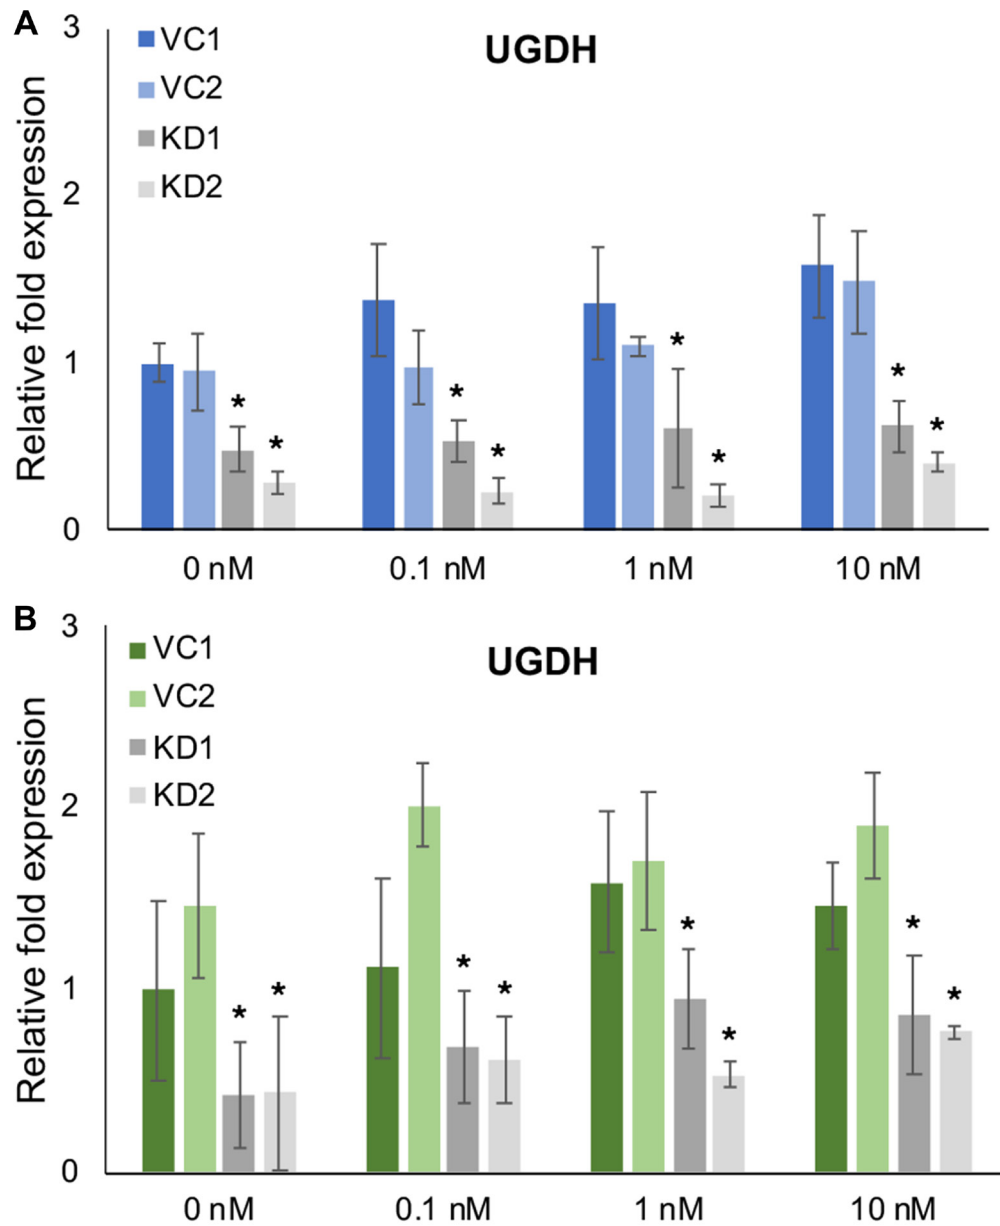

**Supplementary Figure 4: UGDH expression in LNCaP knockdown cells.** Cells were incubated in the presence and absence of DHT as indicated (in nM), and assayed by western blot, followed by densitometric analysis relative to tubulin. Mean  $\pm$  SEM is plotted. \* $p < 0.05$  relative to VC1 or VC2 at all [DHT]. (A) LNCaP AD clones VC1, VC2, KD1 and KD2. (B) LNCaP CR clones VC1, VC2, KD1 and KD2.

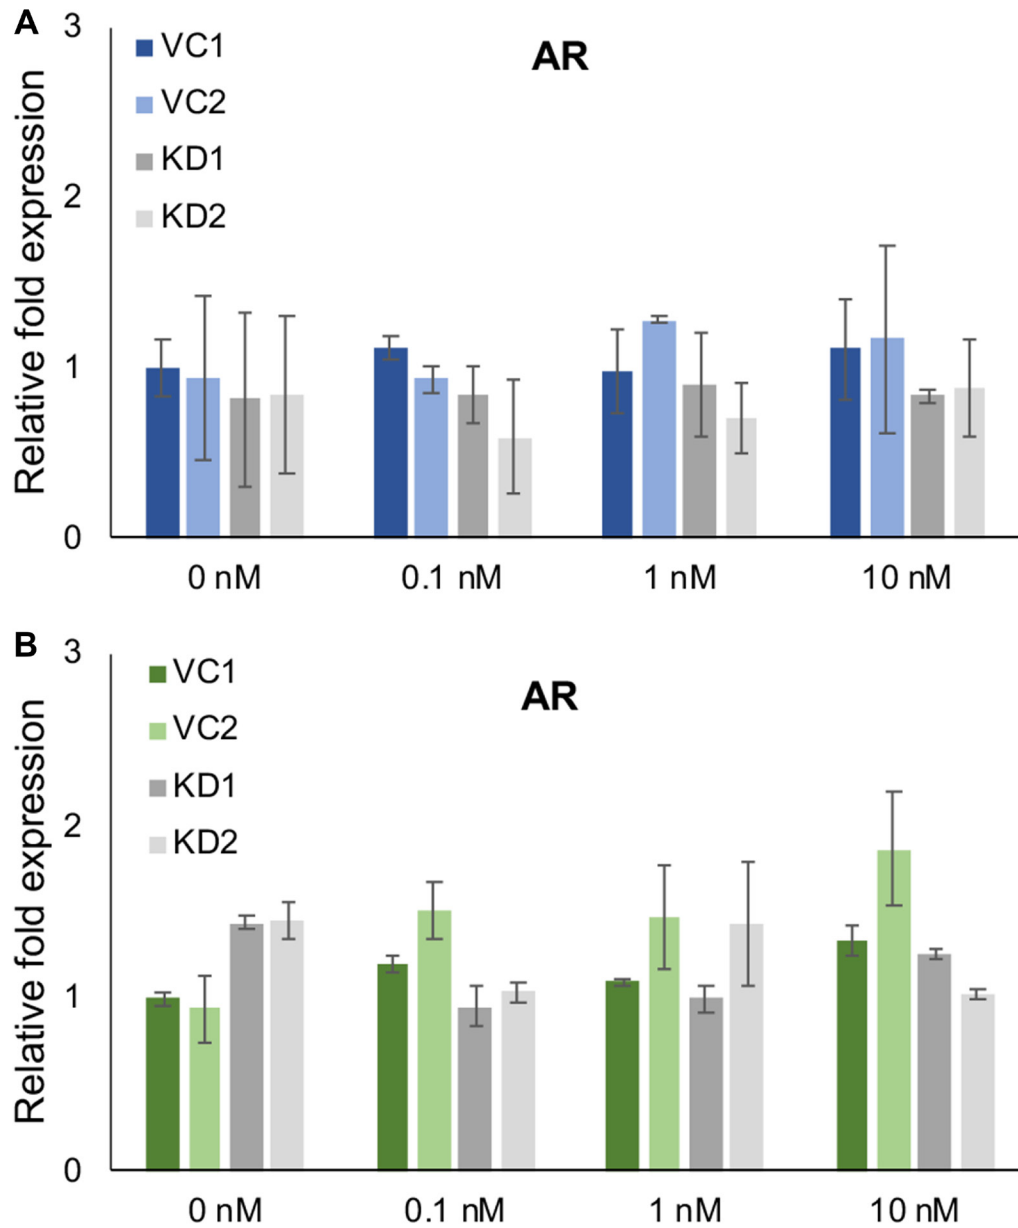

**Supplementary Figure 5: AR expression in the presence and absence of DHT (in nM).** Cell lysates were assayed by western blot and densitometric analysis. Mean  $\pm$  SEM is plotted for technical triplicates of a representative assay. No consistent, statistically significant differences were found between three replicate assays. (A) LNCaP AD clones VC1, VC2, KD1 and KD2. (B) LNCaP CR clones VC1, VC2, KD1 and KD2.

**A LNCaP AD: Basal Overexpression**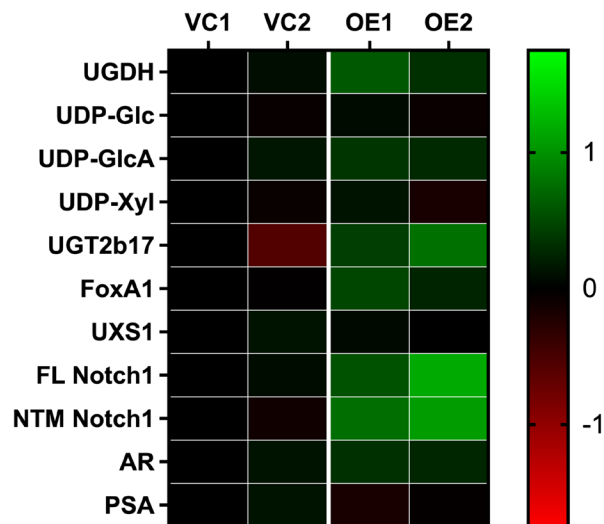**C LNCaP AD: Basal Knock Down**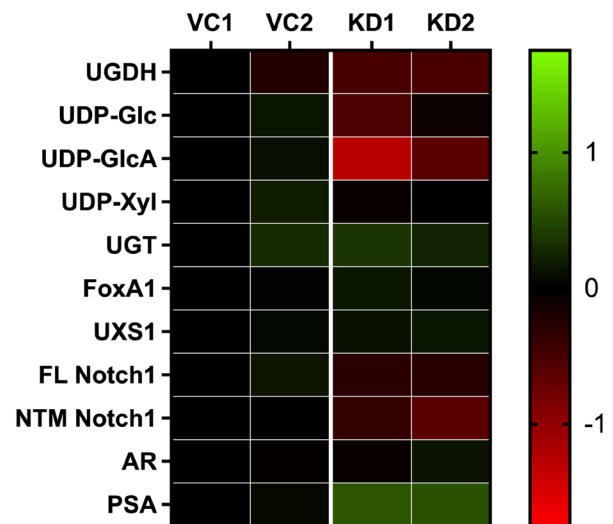**B LNCaP CR: Basal Overexpression**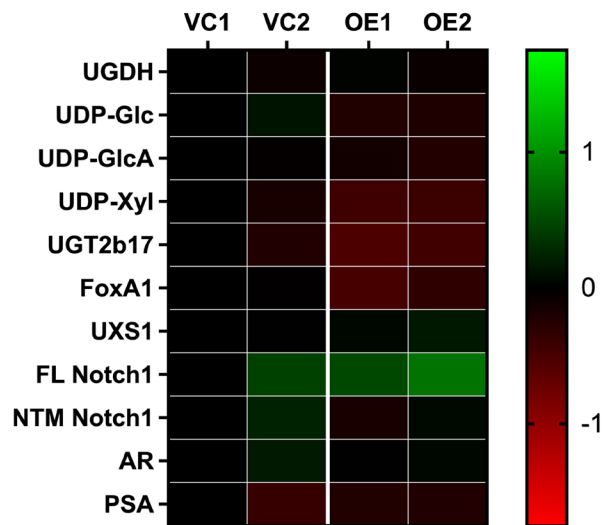**D LNCaP CR: Basal Knock Down**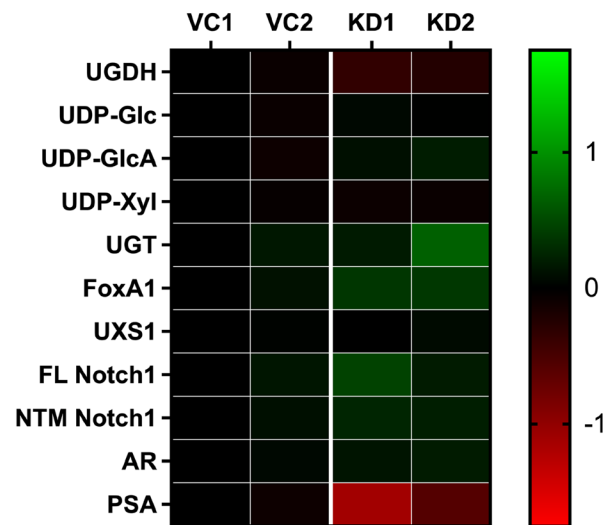

**Supplementary Figure 6: Heat map summaries of gene expression and metabolite levels in androgen replete (standard media) conditions for all LNCaP stable lines in this study. (A) LNCaPAD: VC1, VC2, OE1 and OE2. (B) LNCaPCR: VC1, VC2, OE1 and OE2. (C) LNCaPAD: VC1, VC2, KD1 and KD2. (D) LNCaPCR: VC1, VC2, KD1 and KD.**

**Supplementary Table 1: Summary of PDX analysis data**

| PDX  | UGDH     |          | AR       |          | PSA      |          | UGT2B17  |          | FoxA1    |          |
|------|----------|----------|----------|----------|----------|----------|----------|----------|----------|----------|
|      | AVG      | SEM      | AVG      | SEM      | AVG      | SEM      | AVG      | SEM      | AVG      | SEM      |
| 35   | 6081.797 | 2621.387 | 0.207439 | 0.121739 | 153.8987 | 80.03333 | 6.082016 | 5.786448 | 43.72533 | 7.672095 |
| 35CR | 3372.67  | 2818.711 | 43.72428 | 42.93949 | 730.0113 | 359.7509 | 8.82907  | 5.457579 | 408.8726 | 218.1072 |
| 70   | 5889.486 | 2527.798 | 0.218073 | 0.077746 | 1926.155 | 931.022  | 5.436722 | 4.950628 | 13.44789 | 6.456604 |
| 70CR | 967.0483 | 361.019  | 3.791157 | 3.238912 | 192.5884 | 100.7285 | 1.034572 | 0.467358 | 189.5833 | 138.8172 |
| 73   | 3531.301 | 986.1269 | 0.626632 | 0.288289 | 3858.428 | 2011.609 | 9.111407 | 8.551982 | 431.165  | 294.0716 |
| 73CR | 527.1651 | 243.5313 | 1.507589 | 1.180627 | 326.125  | 108.8948 | 3.69946  | 3.388315 | 1101.582 | 834.9526 |
| 77   | 700.2079 | 450.1768 | 1.406759 | 0.796961 | 2363.417 | 1832.864 | 5.415568 | 5.349139 | 1243.99  | 1025.934 |
| 77CR | 2395.406 | 320.9297 | 0.34817  | 0.231686 | 1552.423 | 476.5753 | 5.725311 | 5.057324 | 14.6924  | 6.389439 |
| 78   | 1758.75  | 1386.234 | 0.534968 | 0.530682 | 8329.478 | 6985.702 | 13.95689 | 13.3537  | 2266.317 | 2137.625 |
| 78CR | 447.4017 | 199.5643 | 0.266581 | 0.115768 | 2373.786 | 1263.239 | 19.25534 | 18.9938  | 512.9025 | 343.0869 |

| PDX  | UXS1     |          | FL Notch1 |          | NTM Notch1 |          | UDP-Glc  |          | UDP-GlcA |          | UDP-Xyl  |          |
|------|----------|----------|-----------|----------|------------|----------|----------|----------|----------|----------|----------|----------|
|      | AVG      | SEM      | AVG       | SEM      | AVG        | SEM      | AVG      | SEM      | AVG      | SEM      | AVG      | SEM      |
| 35   | 25.56128 | 12.35877 | 0.114336  | 0.052877 | 10.50659   | 4.710941 | 28.69659 | 0.741416 | 6.856845 | 0.123088 | 3.13796  | 0.065318 |
| 35CR | 67.2848  | 34.98683 | 7.460705  | 4.745312 | 81.89918   | 31.58057 | 7.449272 | 0.148585 | 3.004916 | 0.076579 | 1.466038 | 0.028149 |
| 70   | 34.17581 | 27.85825 | 0.106423  | 0.043996 | 2.22048    | 1.073715 | 22.00297 | 0.601857 | 4.154504 | 0.122034 | 2.051604 | 0.051982 |
| 70CR | 4.637109 | 1.499665 | 0.88033   | 0.281072 | 30.67324   | 12.99841 | 30.56777 | 1.037419 | 3.752115 | 0.097089 | 2.29086  | 0.100855 |
| 73   | 62.71423 | 31.02339 | 0.880982  | 0.687656 | 54.98429   | 52.13365 | 15.93269 | 0.068953 | 12.04567 | 0.085619 | 0.847021 | 0.008717 |
| 73CR | 37.71919 | 15.21936 | 13.37932  | 7.910484 | 53.22274   | 22.11425 | 27.94636 | 0.423033 | 4.982188 | 0.155922 | 1.104568 | 0.031804 |
| 77   | 25.63538 | 18.69072 | 0.182929  | 0.118707 | 15.6387    | 10.89852 | 32.6933  | 1.379913 | 5.841235 | 0.240743 | 1.695015 | 0.077248 |
| 77CR | 33.68304 | 9.377558 | 0.410634  | 0.130368 | 2.214967   | 0.381835 | 2.704074 | 0.102177 | 1.058792 | 0.044252 | 0.290625 | 0.004113 |
| 78   | 111.1579 | 63.39076 | 5.468828  | 2.439215 | 256.4028   | 244.7156 | 6.283618 | 0.134129 | 8.827111 | 0.143124 | 1.208538 | 0.032426 |
| 78CR | 52.04574 | 41.96551 | 2.697154  | 0.461806 | 39.06587   | 26.17153 | 7.107744 | 0.240452 | 5.325954 | 0.155484 | 1.689428 | 0.097622 |

\*Gene expression was analyzed by western blot; all values are normalized to MHCII, probed simultaneously and quantified ratiometrically as detailed in Materials and Methods. UDP-sugar data were measured by LC-MS and are given in nmol/mg of protein.

**Supplementary Table 2: Summary of LNCaP subclone analysis data\***

|                | UGDH     |          | AR       |          | PSA      |          | UGT2B217 |          | FoxA1    |          |
|----------------|----------|----------|----------|----------|----------|----------|----------|----------|----------|----------|
|                | AVG      | SEM      | AVG      | SEM      | AVG      | SEM      | AVG      | SEM      | AVG      | SEM      |
| <b>LNCaPAD</b> | 2.639159 | 0.093811 | 1.211163 | 0.301172 | 2.71206  | 0.297906 | 0.463009 | 0.043556 | 1.684355 | 0.270172 |
| UGDH VC1       | 0.1618   | 0.030335 | 0.020413 | 0.003973 | 0.3261   | 0.031379 | 0.052327 | 0.009805 | 0.167696 | 0.045825 |
| UGDH VC2       | 0.1107   | 0.033585 | 0.017254 | 0.000978 | 0.3701   | 0.075871 | 0.043908 | 0.005444 | 0.173435 | 0.075635 |
| UGDH KD1       | 0.0895   | 0.03491  | 0.117249 | 0.023577 | 0.5326   | 0.063826 | 0.065039 | 0.012067 | 0.129248 | 0.020555 |
| UGDH KD2       | 0.0753   | 0.014716 | 0.091314 | 0.005772 | 1.2474   | 0.125203 | 0.09122  | 0.001649 | 0.18392  | 0.008776 |
| UGDH EV1       | 1.754242 | 0.385099 | 0.937012 | 0.163578 | 2.765219 | 0.281583 | 0.376042 | 0.0722   | 1.814863 | 0.206805 |
| UGDH EV2       | 2.196553 | 0.71792  | 0.735501 | 0.085682 | 2.551565 | 0.112547 | 0.480431 | 0.083753 | 1.659163 | 0.223477 |
| UGDH OE1       | 6.686065 | 0.600624 | 0.652025 | 0.107583 | 0.559889 | 0.079847 | 1.37744  | 0.274005 | 4.914208 | 0.91662  |
| UGDH OE2       | 10.55504 | 1.885689 | 0.687214 | 0.053339 | 0.90499  | 0.013532 | 3.512035 | 0.549901 | 2.861257 | 0.211021 |

|                | UXS1     |          | FL Notch1 |          | NTM Notch1 |          | UDP-Glc  |         | UDP-GlcA |          | UDP-xylose |          |
|----------------|----------|----------|-----------|----------|------------|----------|----------|---------|----------|----------|------------|----------|
|                | AVG      | SEM      | AVG       | SEM      | AVG        | SEM      | AVG      | SEM     | AVG      | SEM      | AVG        | SEM      |
| <b>LNCaPAD</b> | 0.051151 | 0.002085 | 0.006993  | 0.001591 | 0.289618   | 0.073277 | 1.816435 | 0.79788 | 0.607596 | 0.11121  | 0.431415   | 0.08373  |
| UGDH VC1       | 0.0126   | 0.001578 | 0.121524  | 0.003    | 0.023741   | 0.007586 | 0.17291  | 0.00609 | 0.222663 | 0.01184  | 0.018313   | 0.00115  |
| UGDH VC2       | 0.0140   | 0.002225 | 0.087794  | 0.014962 | 0.022937   | 0.003758 | 0.104827 | 0.00566 | 0.281669 | 0.05654  | 0.012862   | 0.00106  |
| UGDH KD1       | 0.0165   | 0.001923 | 0.043806  | 0.023027 | 0.010416   | 0.003105 | 0.140134 | 0.00308 | 0.0071   | 3.00E-04 | 0.0044     | 7.65E-05 |
| UGDH KD2       | 0.0177   | 0.001774 | 0.045421  | 0.014    | 0.005669   | 0.001751 | 0.139963 | 0.00934 | 0.053361 | 0.01251  | 0.007992   | 0.00041  |
| UGDH EV1       | 0.056964 | 0.008977 | 0.007817  | 0.001711 | 0.249875   | 0.035629 | 0.88179  | 0.28842 | 0.797408 | 0.25734  | 0.249548   | 0.09899  |
| UGDH EV2       | 0.048378 | 0.001448 | 0.010605  | 0.005397 | 0.454422   | 0.119184 | 0.773878 | 0.25997 | 0.721379 | 0.15232  | 0.213239   | 0.08189  |
| UGDH OE1       | 0.065071 | 0.006081 | 0.025735  | 0.002371 | 0.839054   | 0.135892 | 0.859168 | 0.23240 | 1.164992 | 0.19600  | 0.222848   | 0.04283  |
| UGDH OE2       | 0.055734 | 0.004935 | 0.018974  | 0.000788 | 0.949407   | 0.097704 | 0.778217 | 0.27721 | 1.093979 | 0.28299  | 0.174151   | 0.05038  |

\*Gene expression was analyzed by western blot; all values are normalized to Tubulin, probed simultaneously and quantified ratiometrically as detailed in Materials and Methods. UDP-sugar data are given in nmol/million cells.

|                 | UGDH     |          | AR       |          | PSA      |          | UGT2B17  |          | FoxA1    |          |
|-----------------|----------|----------|----------|----------|----------|----------|----------|----------|----------|----------|
|                 | AVG      | SEM      | AVG      | SEM      | AVG      | SEM      | AVG      | SEM      | AVG      | SEM      |
| <b>LNCaP CR</b> | 4.147754 | 0.360326 | 1.441548 | 0.166739 | 0.492456 | 0.097911 | 1.177323 | 0.186879 | 6.50063  | 1.109056 |
| UGDH VC1        | 5.397728 | 0.067438 | 1.102965 | 0.018812 | 2.09105  | 0.133042 | 0.227314 | 0.008332 | 1.782469 | 0.446101 |
| UGDH VC2        | 4.705717 | 0.082776 | 1.239333 | 0.016831 | 1.702492 | 0.241893 | 0.324374 | 0.031764 | 2.301977 | 0.31621  |
| UGDH KD1        | 3.056545 | 0.134114 | 1.502634 | 0.079326 | 0.159318 | 0.014552 | 0.339332 | 0.043178 | 4.137812 | 0.185045 |
| UGDH KD2        | 3.072138 | 0.172032 | 1.68103  | 0.154068 | 0.553523 | 0.055624 | 1.030477 | 0.025634 | 4.211831 | 0.764841 |
| UGDH EV1        | 4.316107 | 0.118493 | 1.005196 | 0.096437 | 0.301663 | 0.025201 | 1.185996 | 0.466379 | 2.618253 | 0.430241 |
| UGDH EV2        | 3.919878 | 0.051935 | 1.140746 | 0.079768 | 0.369051 | 0.013052 | 1.914567 | 0.171767 | 2.528472 | 0.220311 |
| UGDH OE1        | 7.736747 | 0.180577 | 1.366543 | 0.096792 | 0.239678 | 0.019003 | 0.36522  | 0.045792 | 0.847919 | 0.208304 |
| UGDH OE2        | 6.311697 | 0.364574 | 1.298963 | 0.218346 | 0.198729 | 0.027603 | 0.35267  | 0.081224 | 1.238831 | 0.058807 |

|                 | UXS1     |          | FL Notch1 |          | NTM Notch1 |          | UDP-Glc  |          | UDP-GlcA |          | UDP-xylose |         |
|-----------------|----------|----------|-----------|----------|------------|----------|----------|----------|----------|----------|------------|---------|
|                 | AVG      | SEM      | AVG       | SEM      | AVG        | SEM      | AVG      | SEM      | AVG      | SEM      | AVG        | SEM     |
| <b>LNCaP CR</b> | 0.025731 | 0.005729 | 0.042134  | 0.004902 | 1.084005   | 0.339868 | 0.797716 | 0.322151 | 1.550292 | 0.287243 | 0.170168   | 0.01059 |
| UGDH VC1        | 0.033045 | 0.001592 | 0.023435  | 0.005671 | 1.004938   | 0.063559 | 30.34756 | 2.953063 | 75.85319 | 9.099002 | 0.87294    | 0.07774 |
| UGDH VC2        | 0.034626 | 0.006043 | 0.029007  | 0.002229 | 1.122215   | 0.035892 | 25.77202 | 3.524726 | 61.47739 | 8.894368 | 0.78231    | 0.08708 |
| UGDH KD1        | 0.03288  | 7.69E-05 | 0.091929  | 0.005877 | 1.166316   | 0.036094 | 33.99147 | 9.725733 | 95.08412 | 17.551   | 0.718452   | 0.13663 |
| UGDH KD2        | 0.038504 | 0.004125 | 0.02511   | 0.005755 | 1.051731   | 0.105455 | 30.66253 | 6.242124 | 117.9478 | 13.53122 | 0.735662   | 0.10927 |
| UGDH EV1        | 0.025507 | 0.00116  | 0.003681  | 0.00179  | 0.222118   | 0.032025 | 0.458422 | 0.26467  | 0.601456 | 0.347251 | 0.31927    | 0.18433 |
| UGDH EV2        | 0.025803 | 0.000939 | 0.010273  | 0.002174 | 0.378577   | 0.046869 | 0.953112 | 0.55028  | 0.333528 | 0.192563 | 0.083546   | 0.04823 |
| UGDH OE1        | 0.027697 | 0.001276 | 0.011391  | 0.002027 | 0.150885   | 0.016595 | 0.28297  | 0.163373 | 0.095542 | 0.055161 | 0.062984   | 0.03636 |
| UGDH OE2        | 0.037246 | 0.001599 | 0.022319  | 0.000978 | 0.253895   | 0.015639 | 0.329721 | 0.190364 | 0.097923 | 0.056536 | 0.057792   | 0.03336 |

\*Gene expression was analyzed by western blot; all values are normalized to Tubulin, probed simultaneously and quantified ratiometrically as detailed in Materials and Methods. UDP-sugar data are given in nmol/million cells.
